# Supplementary material
Source: Research Square preprint supplement (doi:10.21203/rs.3.rs-10285281/v1)
Supplement: Supplementary file 1 [file 3918ff39e0a29ed05d984ac1.docx]

# **Supplementary Material A — Indicative materials, equipment, and reagents**

The following list is indicative and vendor-sourced for engineering-design purposes; costs are approximate 2025–2026 quotations subject to regional variation and should be re-verified prior to procurement.

| **Item** | **Specification** | **Approx. reference cost (USD)** |
| --- | --- | --- |
| BDD anode | Si/BDD, 0.5 m², B 8,000 ppm | ~12,500 |
| SS316L cathode | Plate, 0.5 m², 3 mm | ~180 |
| DC rectifier | 0–30 V, 0–50 A, programmable | ~3,200 |
| PLC + HMI | Siemens S7-1200 class + touch panel | ~1,900 |
| pH/T probe | Laboratory-grade combination probe | ~650 |
| F⁻ ion-selective electrode | With reference electrode | ~780 |
| Peristaltic/dosing pump | 0.1–100 mL/min range | ~1,450 |
| Solar PV array | ~1.5 kWp monocrystalline + inverter | ~1,250 |
| LiFePO4 battery bank | 48 V, 100 Ah | ~2,100 |
| Edge AI compute unit | Jetson-class module, ≈40 TOPS, 8 GB | ~600 |
| LC-MS/MS (shared/central lab) | Triple-quadrupole, C18 column | ~95,000 (capital, shared facility) |

**Software:** Python 3.11 (scikit-learn, XGBoost, TensorFlow/PyTorch for LSTM); COMSOL Multiphysics 6.2 for reactor hydrodynamics; MATLAB R2023b with Deep Learning Toolbox; Grafana for dashboarding; QGIS 3.34 for geographic implementation planning.

**Figure sources:** Figures 1, 2, 4, and 5 are the author's own original elaboration. Figure 3 is the author's own original elaboration, conceptually informed by the anode/cathode mechanism described in Panizza & Cerisola (2009), https://doi.org/10.1021/cr9001319, without reproduction of any copyrighted image.
